# Supplementary material for: A Combined Approach for Detection of Ovine Small Ruminant Retrovirus Co-Infections
Source: MDPI journal article supplement (doi:10.3390/v15020376), 2023-01-28
Supplement: s1 [file s1]

a)

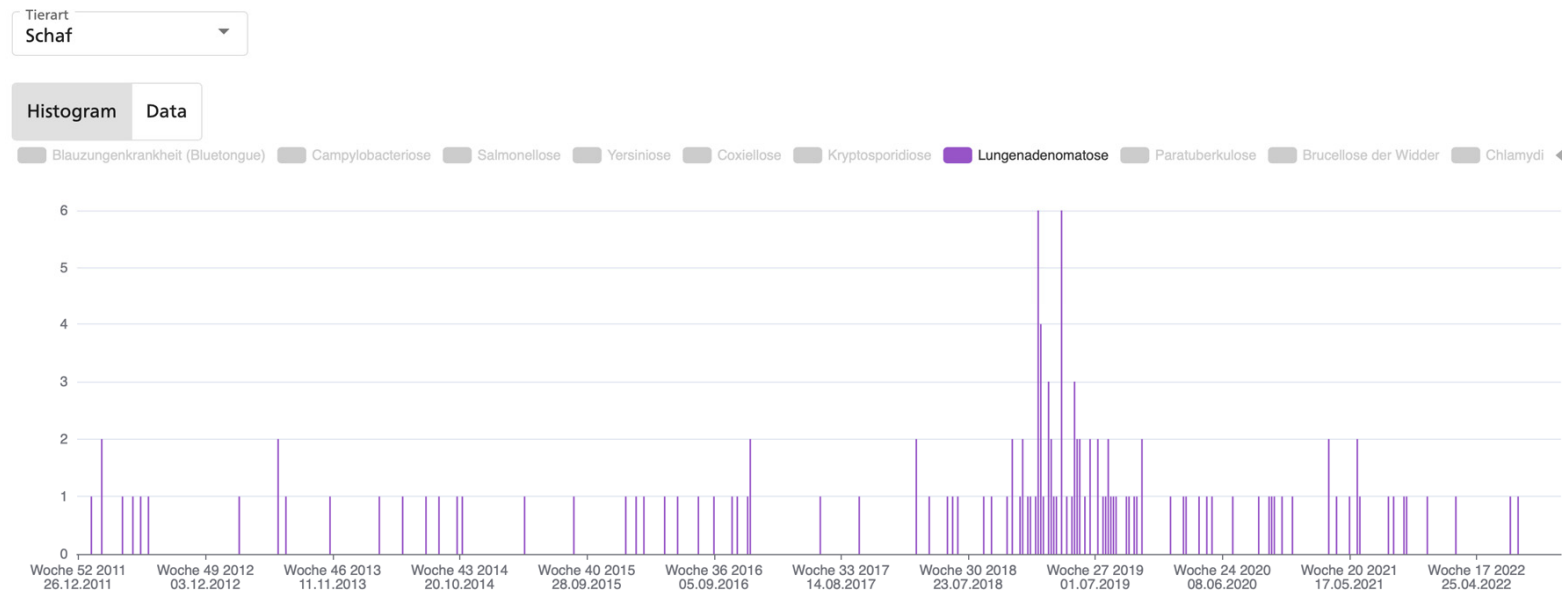

b)

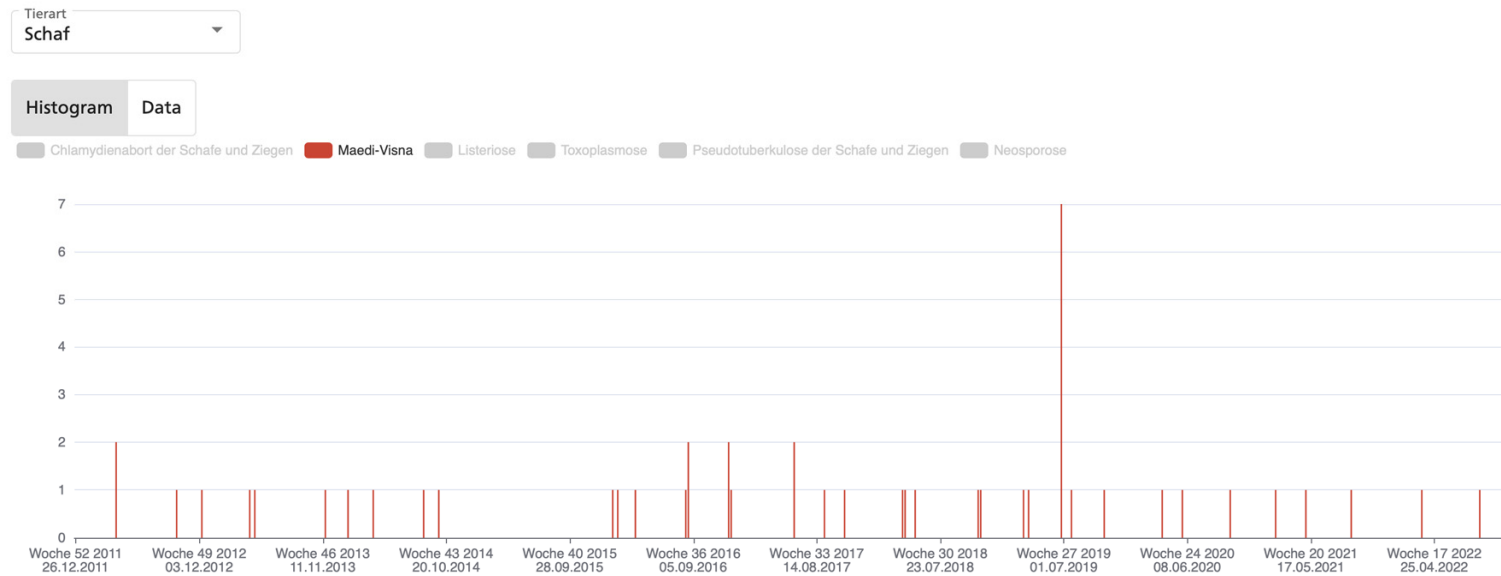

Supplementary Figure S1: Data from the BLV (Bundesamt für Lebensmittelsicherheit und Veterinärwesen; Federal Food Safety and Veterinary Office, Switzerland). Figures show ovine OPA cases (a) and maedi visna cases (b) from 2012 to 2022. During the period of investigation of slaughterhouse samples an increase of positive cases was noted (especially in 2019).

<https://www.infosm.blv.admin.ch/evaluation/animal>
