# Supplementary material for: A Combined Approach for Detection of Ovine Small Ruminant Retrovirus Co-Infections
Source: MDPI journal article supplement (doi:10.3390/v15020376), 2023-01-28
Supplement: s1 [file s1]

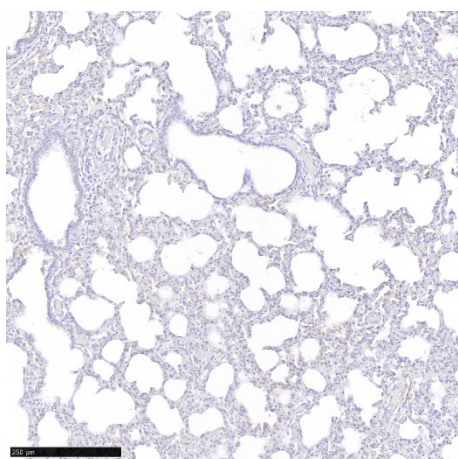

(a)

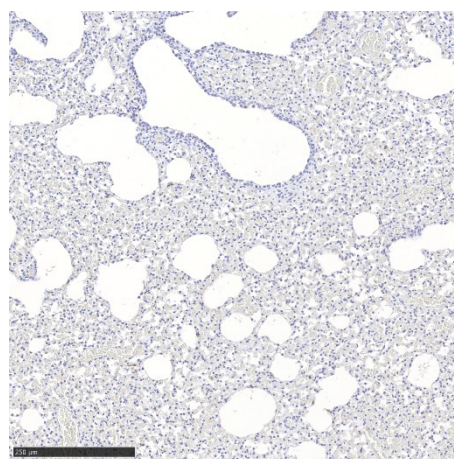

(b)

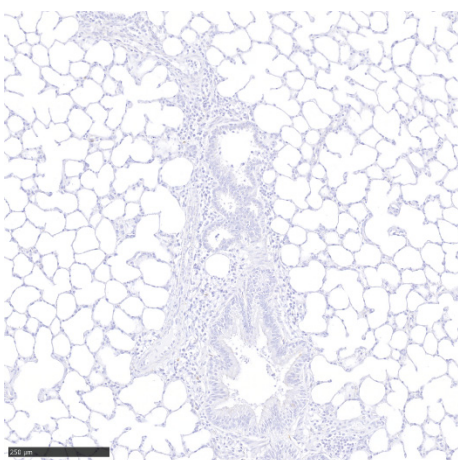

(c)

**Supplementary Figure S4.** Negative controls in immunohistochemistry (a) No immunoreactivity for JSRV antigen in pulmonary tissue of an animal without lesions. (b) No immunoreactivity for MVV antigen in an ovine lung with a purulent pneumonia (c) No immunoreactivity for CAEV antigen in a lung without pulmonary lesions. Chromogen DAB. Bar = 250  $\mu$ m. All animals were PCR negative.
